# Supplementary material for: Redox/photo dual-responsive, self-targeted, and photosensitizer-laden bismuth sulfide nanourchins for combination therapy in cancer
Source: Royal Society of Chemistry journal article supplement (doi:10.1039/d0nr07736d), 2020-12-15
Supplement: d0nr07736d1.pdf [file d0nr07736d1.pdf]

## Supporting Information

### **Redox/photo dual-responsive, self-targeted, and photosensitizer-laden bismuth sulfide nanourchins for combination therapy in cancer**

Kishwor Poudel<sup>a</sup>, Asmita Banstola<sup>b</sup>, Milan Gautam<sup>a</sup>, Zar Chi Soe<sup>a</sup>, Le Minh Pham<sup>a</sup>, Jee-Heon Jeong<sup>a</sup>, Han-Gon Choi<sup>c</sup>, Sae Kwang Ku<sup>d,\*</sup>, Chul Soon Yong<sup>a</sup>, Tuan Hiep Tran<sup>e,f,\*</sup>, Jong Oh Kim<sup>a,\*</sup>

<sup>a</sup> College of Pharmacy, Yeungnam University, Gyeongsan 38541, Republic of Korea

<sup>b</sup> College of Pharmacy, Keimyung University, Daegu, Republic of Korea

<sup>c</sup> College of Pharmacy, Hanyang University, 55, Hanyangdaehak-ro, Sangnok-gu, Ansan 426-791, Republic of Korea

<sup>d</sup> Department of Anatomy and Histology, College of Korean Medicine, Daegu Haany University, Gyeongsan 38610, Republic of Korea

<sup>e</sup> Faculty of Pharmacy, PHENIKAA University, Yen Nghia, Ha Dong, Hanoi 12116, Vietnam

<sup>f</sup> PHENIKAA Research and Technology Institute (PRATI), A&A Green Phoenix Group JSC, No.167 Hoang Ngan, Trung Hoa, Cau Giay, Hanoi 11313, Vietnam

#### **Corresponding Authors:**

Jong Oh Kim, PhD

Tel.: +82-53-810-2813; Fax: +82-53-810-4654

E-mail: [jongohkim@yu.ac.kr](mailto:jongohkim@yu.ac.kr)

Tuan Hiep Tran, PhD

Tel.: +82-53-810-2813; Fax: +82-53-810-4654

E-mail: [hiep.trantuan@phenikaa-uni.edu.vn](mailto:hiep.trantuan@phenikaa-uni.edu.vn)

Sae Kwang Ku, PhD

Tel: +82-53-819-1549; Fax: +82-53-819-1860

E-mail: [gucci200@hanmail.net](mailto:gucci200@hanmail.net)

## Bi<sub>2</sub>O<sub>3</sub> NSs

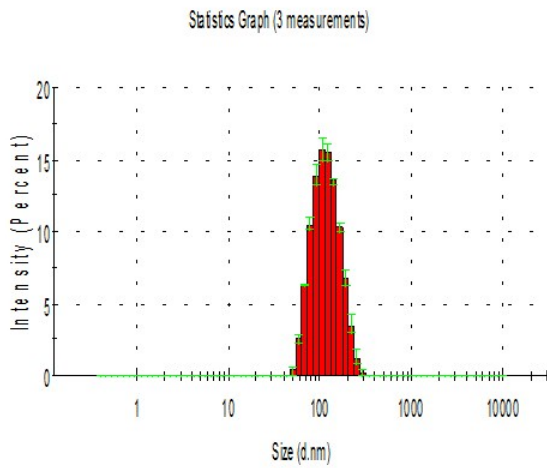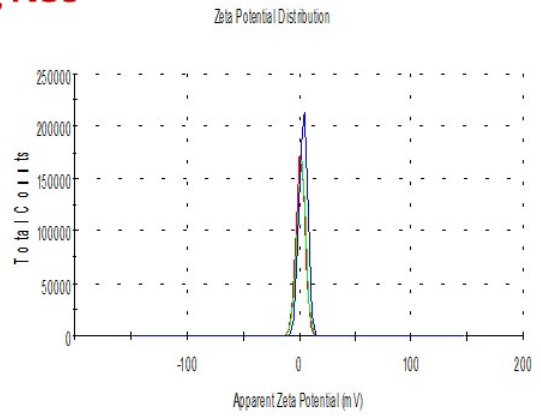

| Sample                             | Particle size (nm) | Poly-dispersity index (PDI) | Zeta Potential (mV) |
|------------------------------------|--------------------|-----------------------------|---------------------|
| Bi <sub>2</sub> O <sub>3</sub> NPs | 109.4 ± 0.86       | 0.117 ± 0.01                | 2.29 ± 1.24         |
| Bi <sub>2</sub> S <sub>3</sub> NPs | 150.9 ± 3.61       | 0.103 ± 0.06                | -33.7 ± 0.40        |

## Bi<sub>2</sub>S<sub>3</sub> NUs

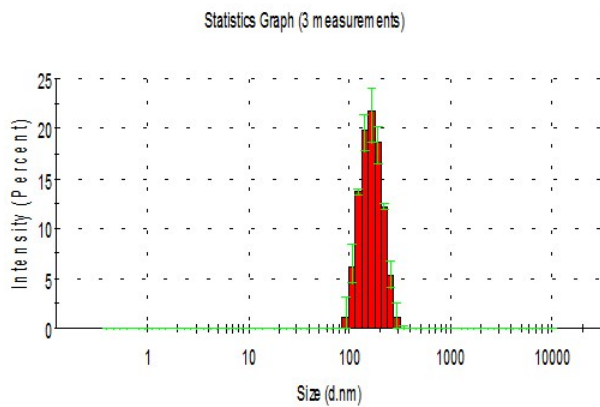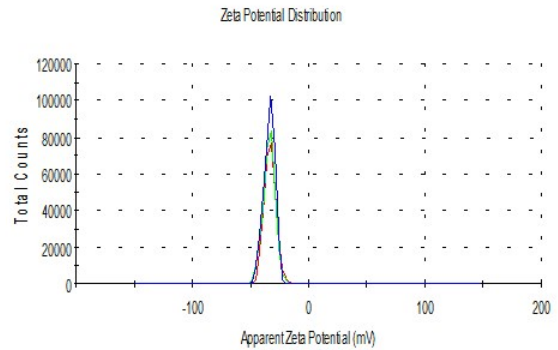

**Figure S1.** DLS characterization of Bi<sub>2</sub>O<sub>3</sub> NSs and Bi<sub>2</sub>S<sub>3</sub> NUs.

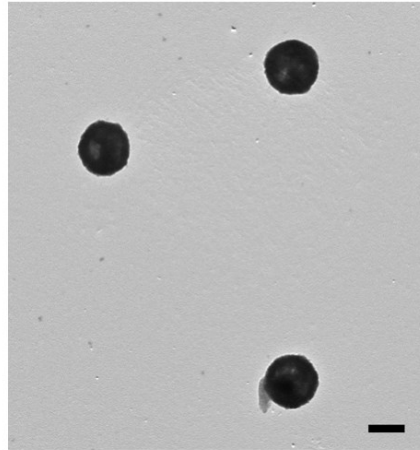

**Figure S2.** TEM image of Bi<sub>2</sub>O<sub>3</sub> NSs, Scale bar: 100 nm.

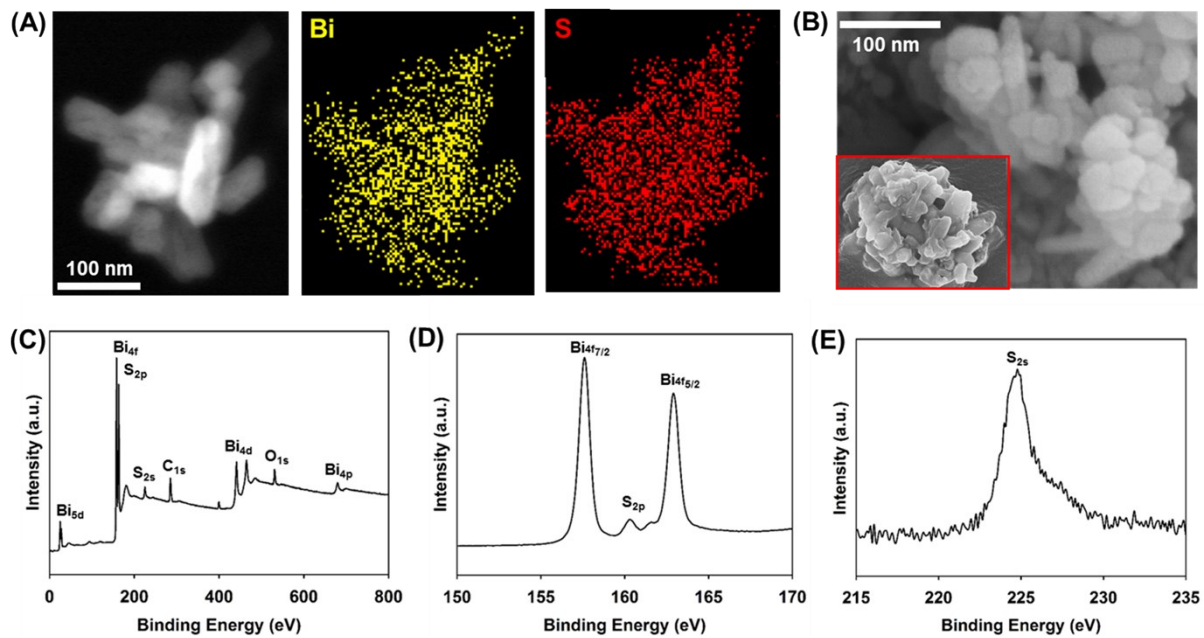

**Figure S3.** (A) TEM-EDS mapping, (B) SEM imaging, and (C, D, and E) XPS analysis of Bi<sub>2</sub>S<sub>3</sub> NUs.

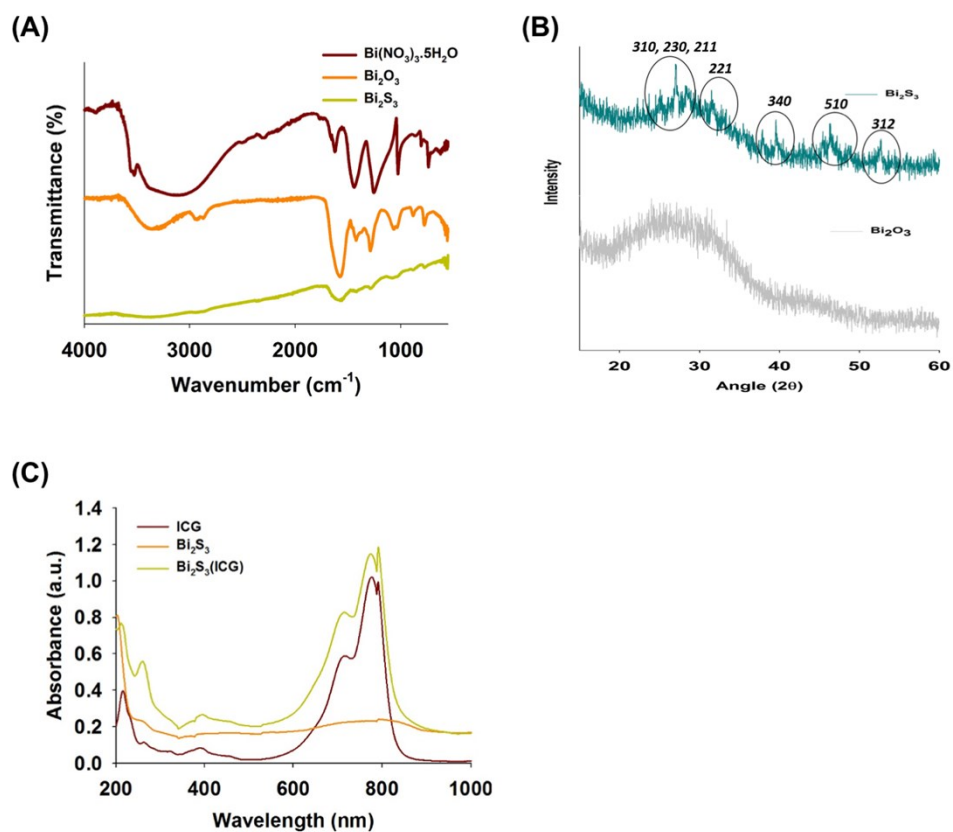

**Figure S4.** (A) FTIR spectras of  $\text{Bi}(\text{NO}_3)_3 \cdot 5\text{H}_2\text{O}$ ,  $\text{Bi}_2\text{O}_3$  NSs and  $\text{Bi}_2\text{S}_3$  NUs. (B) XRD spectras of  $\text{Bi}_2\text{O}_3$  NSs and  $\text{Bi}_2\text{S}_3$  NUs. (C) UV/Vis spectral analysis of ICG,  $\text{Bi}_2\text{S}_3$  and  $\text{Bi}_2\text{S}_3(\text{ICG})$  NUs.

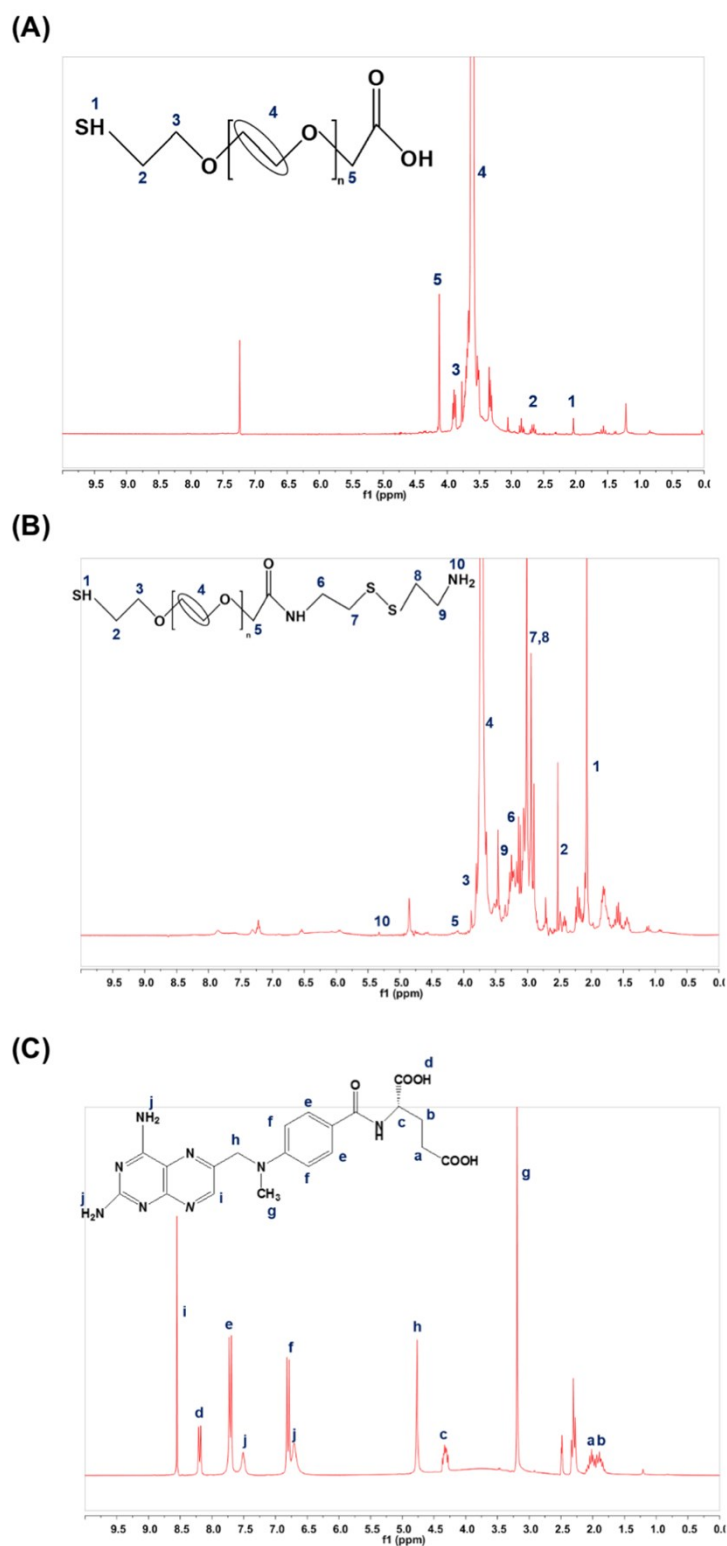

**Figure S5.**  $^1\text{H}$  NMR spectra of SH-PEG<sub>5k</sub>-COOH (A) with its characteristic peaks and SH-PEG<sub>5k</sub>-S-S-NH<sub>2</sub> (B) after the reaction with cystamine with preserved peaks of SH-PEG<sub>5k</sub>-COOH and added peaks of cystamine.  $^1\text{H}$  NMR spectra of MTX (C) with its characteristic peaks and SH-PEG<sub>5k</sub>-S-S-MTX.

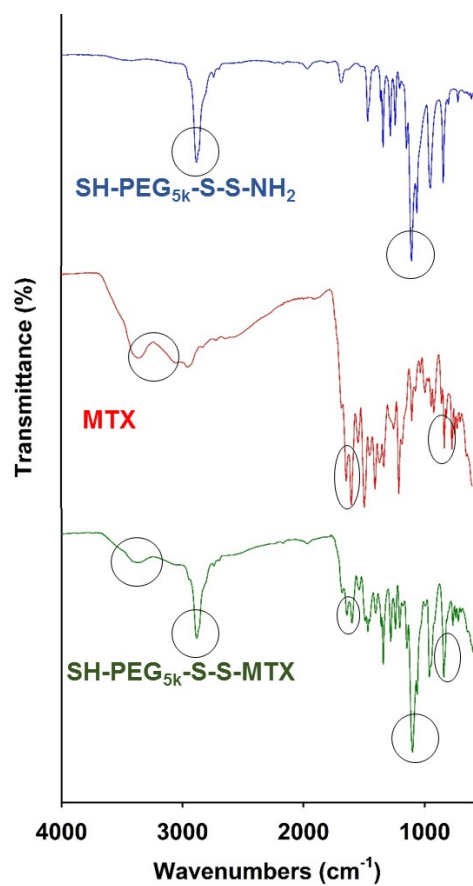

**Figure S6.** FTIR spectra of SH-PEG<sub>5k</sub>-S-S-NH<sub>2</sub>, MTX, and SH-PEG<sub>5k</sub>-S-S-MTX.

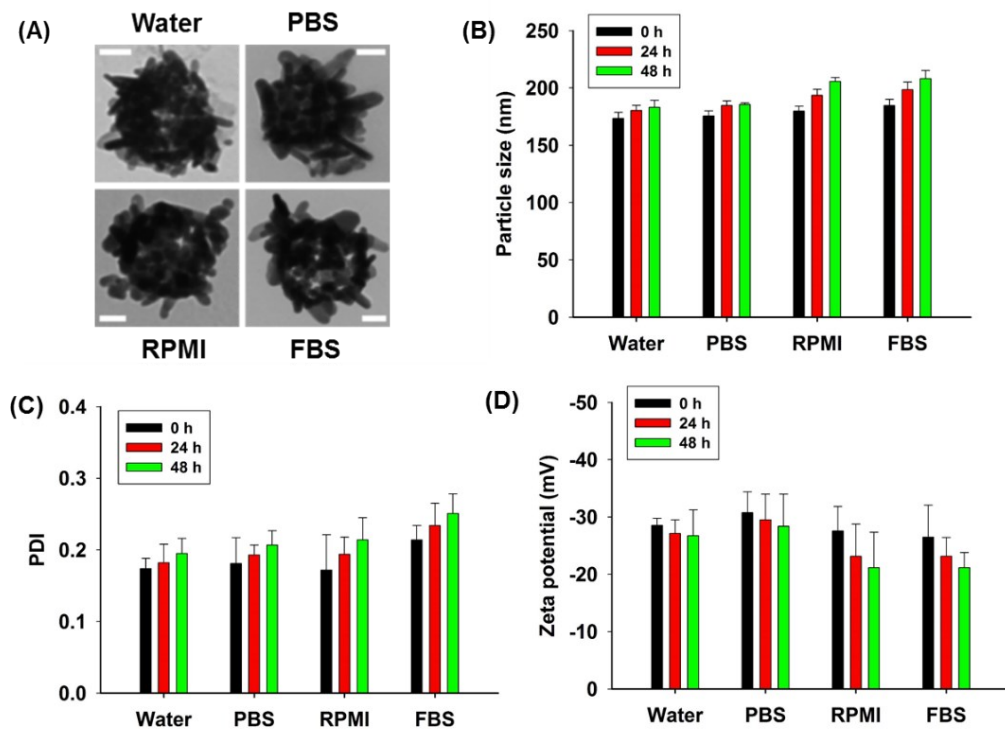

**Figure S7.** Stability evaluations from TEM imaging (A) and DLS characterization (B, C, and D) of  $\text{Bi}_2\text{S}_3(\text{ICG})\text{-PEG-S-S-MTX}$  NUs in different media (water, PBS, RPMI, and FBS) up to 48 h (Scale bar: 50 nm).



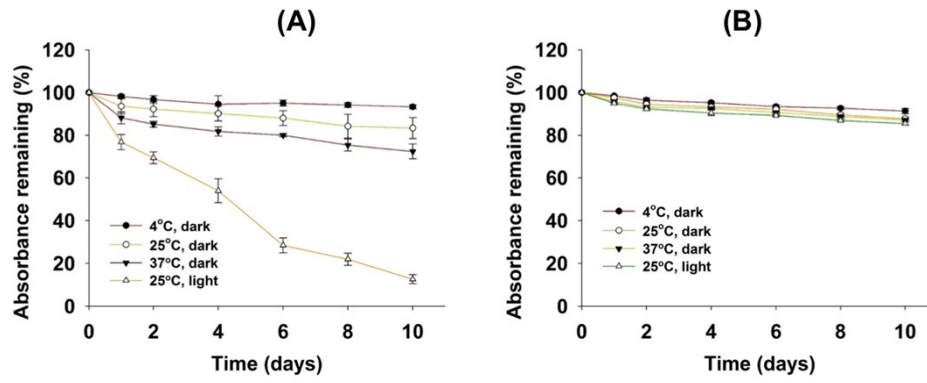

**Figure S8.** Assessment of stability of ICG and ICG in  $\text{Bi}_2\text{S}_3(\text{ICG})\text{-S-S-MTX}$  at different conditions (dark ( $4^\circ\text{C}$ ,  $25^\circ\text{C}$  and  $37^\circ\text{C}$ ) and light ( $25^\circ\text{C}$ )).

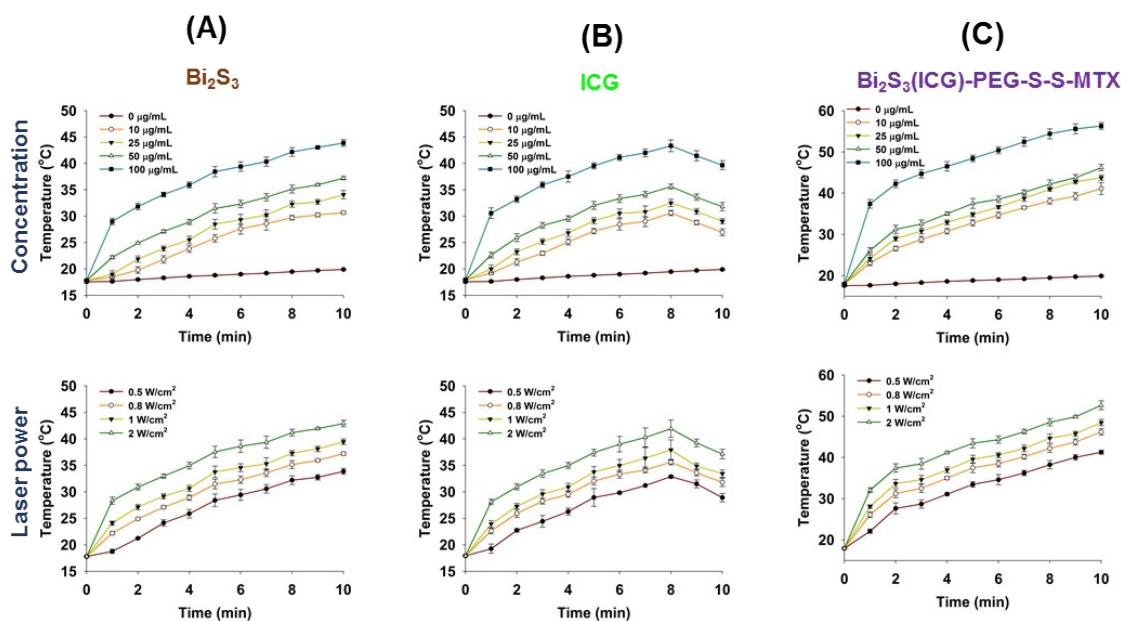

**Figure S9.** Assessment of photothermal performance of Bi<sub>2</sub>S<sub>3</sub> (A), ICG (B), and Bi<sub>2</sub>S<sub>3</sub> (ICG)-S-S-MTX (C) at different concentrations (0, 10, 25, 50, and 100 μg/mL) with 0.8 W/cm<sup>2</sup> and at concentration of 50 μg/mL with different power intensities (0.5, 0.8, 1, and 2 W/cm<sup>2</sup>) of NIR laser (808 nm) up to 10 min. Concentration mentioned in Bi<sub>2</sub>S<sub>3</sub>(ICG)-S-S-MTX is of Bi<sub>2</sub>S<sub>3</sub>, and the ratio of concentration of Bi<sub>2</sub>S<sub>3</sub>:ICG was 1:8.

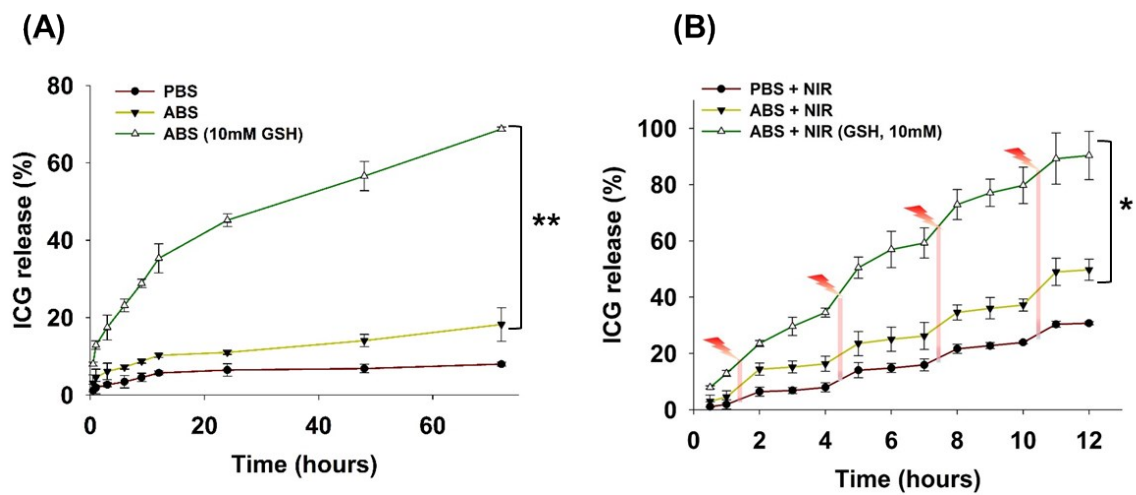

**Figure S10.** *In vitro* release profile of ICG in PBS, ABS (with and without 10 mM GSH) and with NIR irradiation (808 nm, 0.8 W/cm<sup>2</sup>, 10 min), (\*p<.05; \*\*p<.01; \*\*\*p<.001).

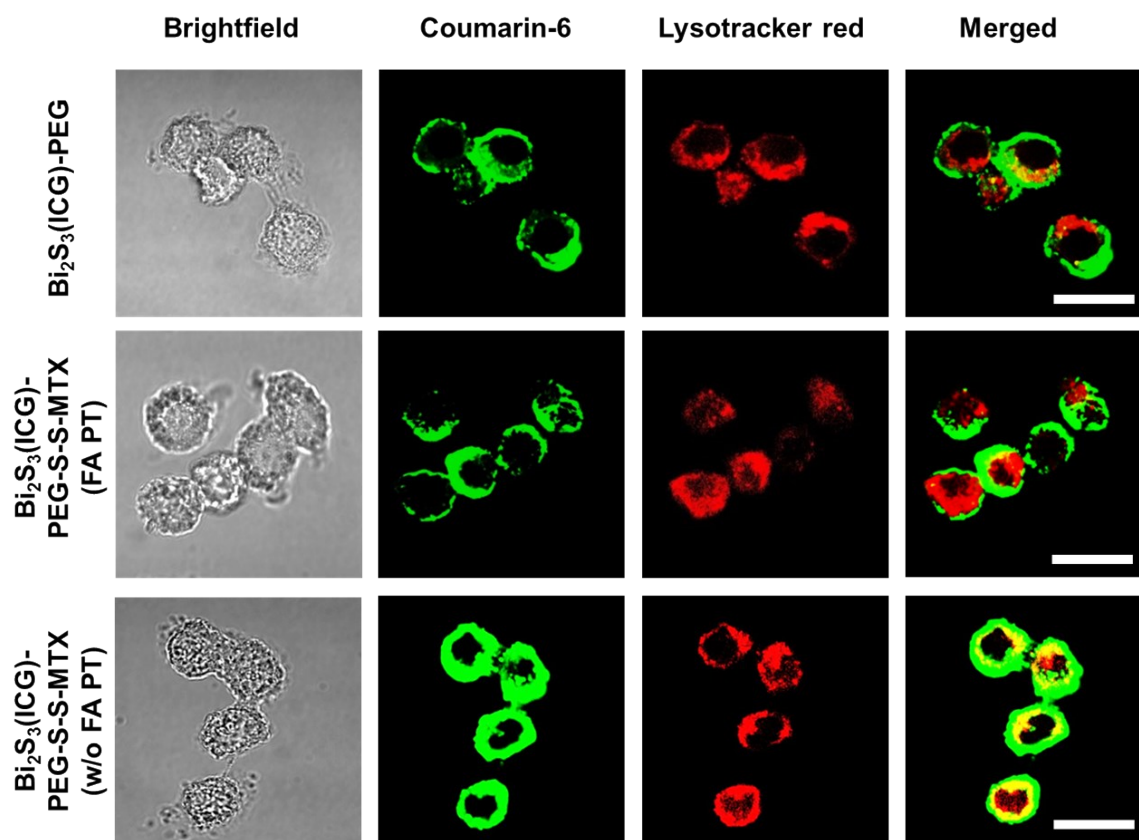

**Figure S11.** Confocal images of HCT116 cells and A549 cells after incubation with  $\text{Bi}_2\text{S}_3(\text{ICG})\text{-PEG}$  and  $\text{Bi}_2\text{S}_3(\text{ICG})\text{-PEG-S-S-MTX}$  NUs ( $3 \mu\text{g/mL}$ , 60 min), and with and without FA PT, Scale bar: 20  $\mu\text{m}$ . Coumarin-6 was used to stain the nanoparticles, and lysotracker red was used to stain the lysosome; FA PT, folic acid pretreatment.

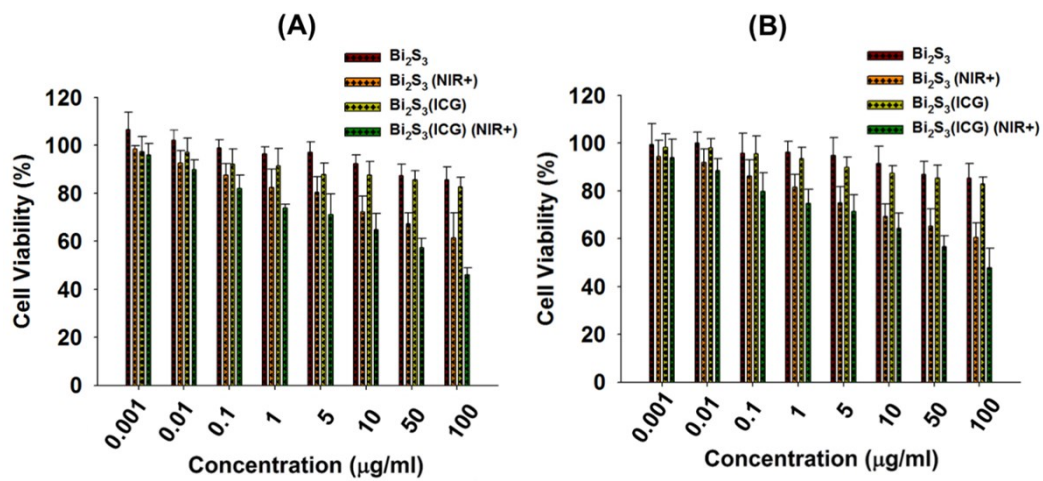

**Figure S12.** *In vitro* cell cytotoxicity profiles of Bi<sub>2</sub>S<sub>3</sub> and Bi<sub>2</sub>S<sub>3</sub>(ICG) in (A) HCT-116 and (B) A549 cells with or without NIR irradiation (808 nm, 0.8 W/cm<sup>2</sup>, 5 min) after 24 h.

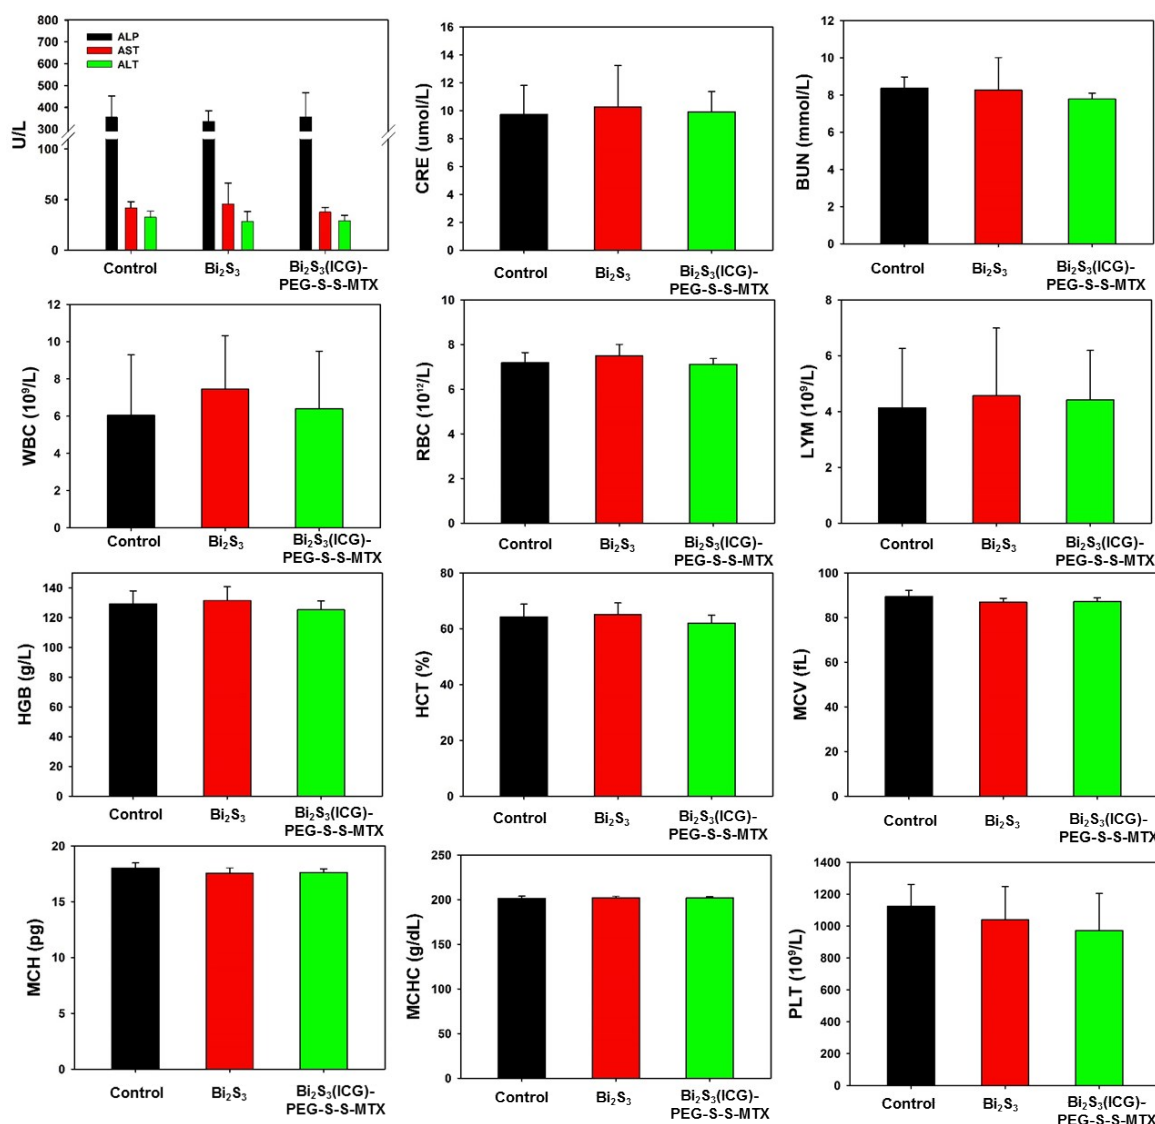

**Figure S13.** Blood biochemistry and complete blood panel analysis of mice after receiving i.v. injection with saline, Bi<sub>2</sub>S<sub>3</sub>, and Bi<sub>2</sub>S<sub>3</sub>(ICG)-PEG-S-S-MTX based on the weight of a mouse (15 mg of Bi kg<sup>-1</sup>) for 15 days. The examined parameters included alanine aminotransferase (ALT), aspartate aminotransferase (AST), alkaline phosphatase (ALP), blood urea nitrogen (BUN), creatinine (CREA), white blood cell (WBC) counts, red blood cell (RBC) counts, lymphocyte (LYM), hemoglobin (HGB), hematocrit (HCT), mean corpuscular volume (MCV), mean corpuscular hemoglobin (MCH), mean corpuscular hemoglobin concentration (MCHC), and platelets (PLT).

**Table S1.** Histopathological-histomorphometrical analysis of principal organs taken from xenograft athymic nude mice

| <b>Groups</b>    | <b>Heart</b> | <b>Liver</b> | <b>Spleen</b> | <b>Lung</b> | <b>Kidney</b> |
|------------------|--------------|--------------|---------------|-------------|---------------|
| <b>Group 1</b>   | 0/6 (0%)     | 0/6 (0%)     | 0/6 (0%)      | 0/6 (0%)    | 0/6 (0%)      |
| <b>Treatment</b> |              |              |               |             |               |
| <b>Group 2</b>   | 0/6 (0%)     | 0/6 (0%)     | 0/6 (0%)      | 0/6 (0%)    | 0/6 (0%)      |
| <b>Group 3</b>   | 0/6 (0%)     | 0/6 (0%)     | 0/6 (0%)      | 0/6 (0%)    | 0/6 (0%)      |
| <b>Group 4</b>   | 0/6 (0%)     | 0/6 (0%)     | 0/6 (0%)      | 0/6 (0%)    | 0/6 (0%)      |
| <b>Group 5</b>   | 0/6 (0%)     | 0/6 (0%)     | 0/6 (0%)      | 0/6 (0%)    | 0/6 (0%)      |
| <b>Group 6</b>   | 0/6 (0%)     | 0/6 (0%)     | 0/6 (0%)      | 0/6 (0%)    | 0/6 (0%)      |

Values were numbers of abnormal fields/total observed fields (Six histological fields in each group)

Group 1 = Control;  
 Group 2 = Bi<sub>2</sub>S<sub>3</sub>(ICG)-PEG;  
 Group 3 = MTX;  
 Group 4 = Bi<sub>2</sub>S<sub>3</sub>(ICG)-PEG-S-S-MTX;  
 Group 5 = Bi<sub>2</sub>S<sub>3</sub>(ICG)-PEG (NIR+);  
 Group 6 = Bi<sub>2</sub>S<sub>3</sub>(ICG)-PEG-S-S-MTX (NIR+)

Bi<sub>2</sub>S<sub>3</sub> = Bismuth sulfide; ICG = Indocyanine green; MTX = Methotrexate; NIR+ = Near-infra red irradiation; PEG = Polyethylene glycol; S-S = Disulfide bond
